# Supplementary material for: Zirconia layer coated mesoporous silica microspheres as HILIC SPE materials for selective glycopeptide enrichment
Source: Royal Society of Chemistry journal article supplement (doi:10.1039/c1an15554g), 2011-01-01

## Supplementary information:

**Fig. S1.** Nano-ESI-Q-TOF mass characterization of tryptic digest mixtures of  $\alpha$ -casein ( $4 \times 10^{-6}$  M) and IgG ( $12 \times 10^{-6}$  M) with volume ratio of 1:1 fractions from ZrO<sub>2</sub>(24)/MCF rinsed or eluted successively with the solvents of different CH<sub>3</sub>CN and acid/basic concentrations. Mass spectra of a) desalted by C18, b) fraction eluted with CH<sub>3</sub>CN/H<sub>2</sub>O/FA (60:40:0.3 (v/v), 90  $\mu$ L), c) fraction eluted with H<sub>2</sub>O/TFA (95:5 (v/v), 60  $\mu$ L), and d) fraction eluted with 2% NH<sub>3</sub>·H<sub>2</sub>O (30  $\mu$ L). Glycopeptide and phosphopeptide peaks are labeled with ▼ and ◆, respectively.

**Fig. S2.** Nano-ESI-Q-TOF mass characterization of tryptic digest mixtures of  $\alpha$ -casein ( $4 \times 10^{-6}$  M) and IgG ( $12 \times 10^{-6}$  M) with volume ratio of 10:1 fractions from ZrO<sub>2</sub>(24)/MCF rinsed or eluted successively with the solvents of different CH<sub>3</sub>CN and acid/basic concentrations. Mass spectra of a) desalted by C18, b) fraction eluted with CH<sub>3</sub>CN/H<sub>2</sub>O/FA (60:40:0.3 (v/v), 90  $\mu$ L), c) fraction eluted with H<sub>2</sub>O/TFA (95:5 (v/v), 60  $\mu$ L), and d) fraction eluted with 2% NH<sub>3</sub>·H<sub>2</sub>O (30  $\mu$ L). Glycopeptide and phosphopeptide peaks are labeled with ▼ and ◆, respectively.

**Fig. S1.**

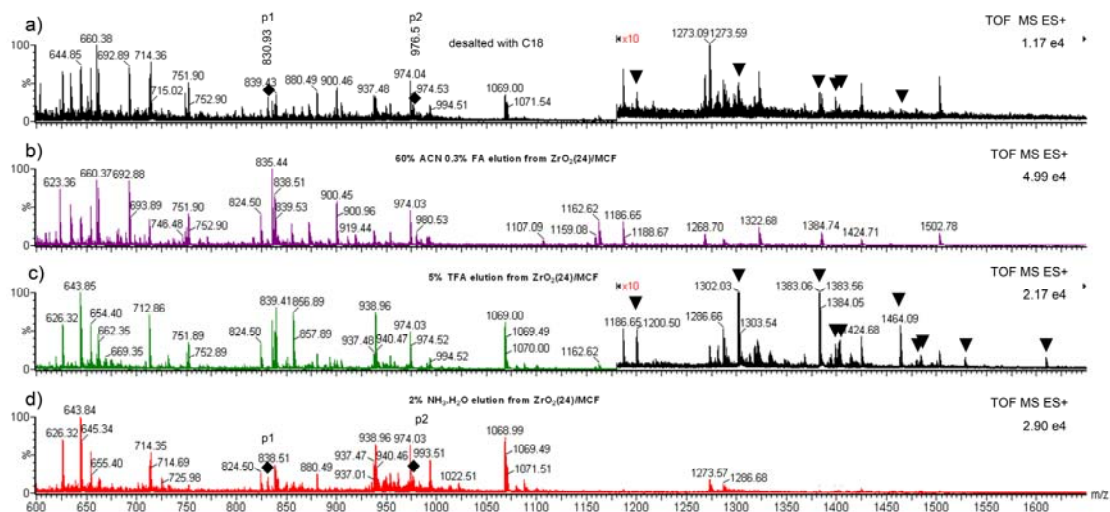

Fig. S2.

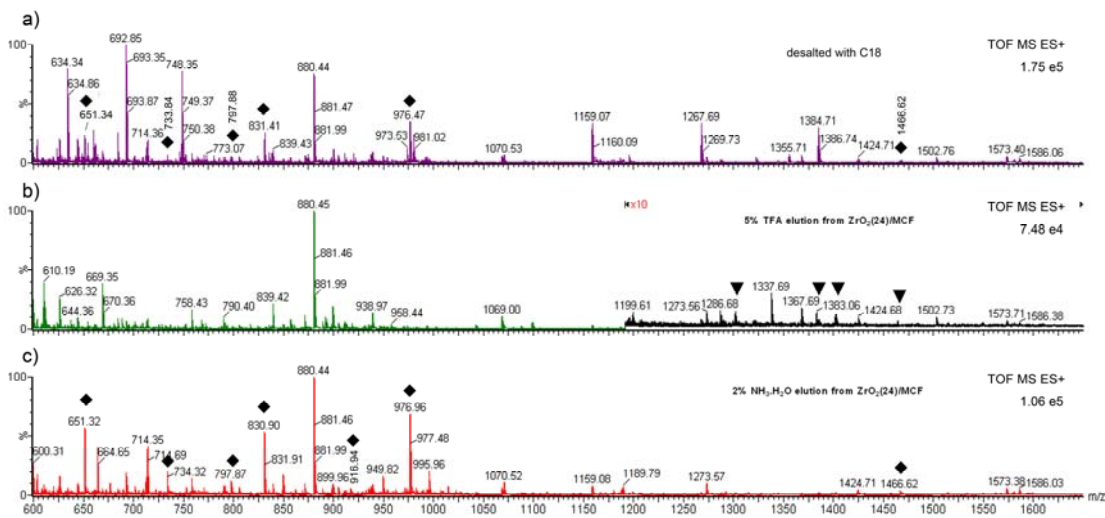

Supplement: c1an15554g.pdf [file c1an15554g.pdf]
